# Supplementary material for: Investigation of different aqueous electrolytes on the electrochemical performance of activated carbon-based supercapacitors
Source: Royal Society of Chemistry journal article supplement (doi:10.1039/c5ra21962k), 2015-01-01
Supplement: c5ra21962k1.pdf [file c5ra21962k1.pdf]

# **Investigation of different aqueous electrolytes on the electrochemical performance of activated carbon-based supercapacitors**

Farshad Barzegar<sup>a</sup>, Damilola. Y. Momodu<sup>a</sup>, Omobosedo. O Fashedemi<sup>b,c</sup>, Abdulhakeem Bello<sup>a</sup>, Julien. K. Dangbegnon<sup>a</sup>, and Ncholu. Manyala<sup>a\*</sup>

<sup>a</sup>Department of Physics, Institute of Applied Materials, SARCHI Chair in Carbon Technology and Materials, University of Pretoria, Pretoria 0028, South Africa.

<sup>b</sup>Department of Chemistry, University of Pretoria, Pretoria 0002, South Africa.

<sup>c</sup>Department of Chemistry, Augustine University, Ilara-Epe, Lagos 106103, Nigeria.

Corresponding Author: \*Email address: [ncholu.manyala@up.ac.za](mailto:ncholu.manyala@up.ac.za) (N. Manyala)

Tel: +27 (0)12 420 3549, Fax: +27 (0)12 420 2516

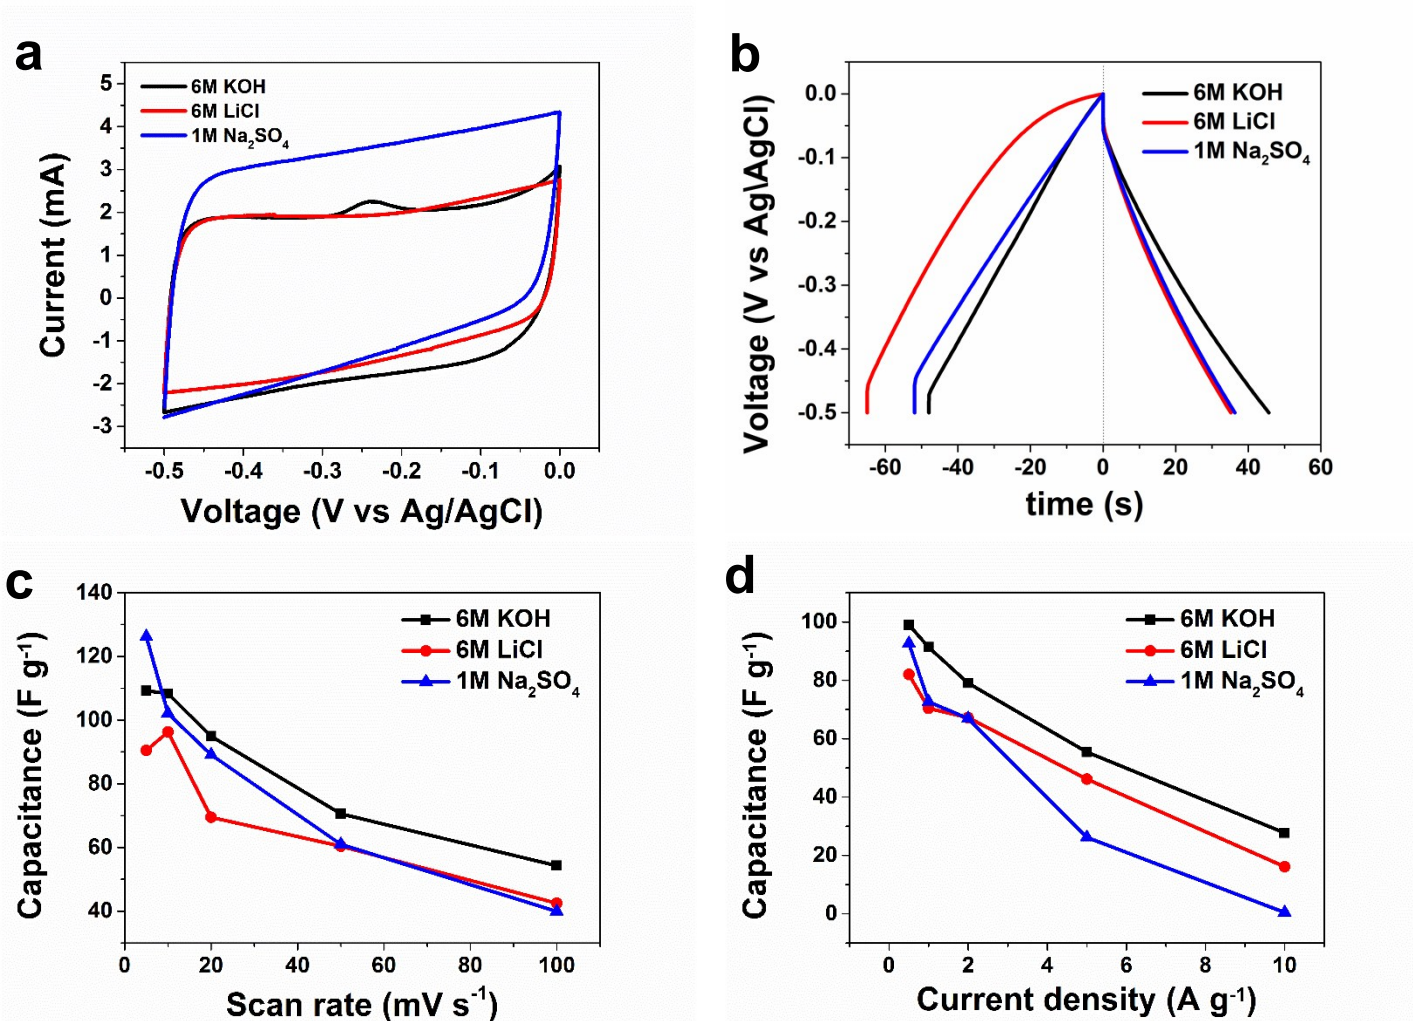

Figure S1 (a) CV curves at scan rates of 5 mV s<sup>-1</sup>, (b) The galvanostatic charge/discharge curves at 1 A g<sup>-1</sup>, (c) the specific capacitance as function of the scan rate and (d) the specific capacitance as function of the current density at 0.5 V potential window

Table S1 Result of the specific capacitance as function of the current density at 0.8 V potential window of 6 M KOH

| 6 M KOH                                            | Current density (A g <sup>-1</sup> ) |        |        |       |       |
|----------------------------------------------------|--------------------------------------|--------|--------|-------|-------|
|                                                    | 0.5                                  | 1      | 2      | 5     | 10    |
| C <sub>Dch</sub> (F g <sup>-1</sup> ) <sup>a</sup> | 129.5                                | 118.49 | 107.11 | 89.38 | 69.88 |
| C <sub>Ch</sub> (F g <sup>-1</sup> ) <sup>a</sup>  | 126.21                               | 115.8  | 107.23 | 89.55 | 70.14 |
| C <sub>Average</sub> (F g <sup>-1</sup> )          | 127.86                               | 117.15 | 107.17 | 89.47 | 70.01 |
| η (%) <sup>b</sup>                                 | 102.6                                | 102.32 | 99.89  | 99.81 | 99.63 |

<sup>a</sup> C<sub>Dch</sub> and C<sub>Ch</sub> refer, respectively, to discharge and charge capacitance.

<sup>b</sup> η = C<sub>Dch</sub>/C<sub>Ch</sub>, the charge/discharge efficiency of electrode with current density

Table S2 Result of the specific capacitance as function of the current density at 0.8 V potential window of 6 M LiCl

| 6 M LiCl                                   | Current density ( $\text{A g}^{-1}$ ) |        |        |       |       |
|--------------------------------------------|---------------------------------------|--------|--------|-------|-------|
|                                            | 0.5                                   | 1      | 2      | 5     | 10    |
| $C_{\text{Dch}}$ ( $\text{F g}^{-1}$ )     | -                                     | 184.22 | 122.63 | 75.75 | 45.05 |
| $C_{\text{Ch}}$ ( $\text{F g}^{-1}$ )      | -                                     | 209.16 | 129.23 | 78.53 | 46.59 |
| $C_{\text{Average}}$ ( $\text{F g}^{-1}$ ) | -                                     | 196.69 | 125.93 | 77.14 | 45.82 |
| $\eta$ (%)                                 | -                                     | 88.07  | 94.89  | 96.46 | 96.69 |

Table S3 Result of the specific capacitance as function of the current density at 0.8 V potential window of 1 M  $\text{Na}_2\text{SO}_4$

| 1 M $\text{Na}_2\text{SO}_4$               | Current density ( $\text{A g}^{-1}$ ) |        |       |       |       |
|--------------------------------------------|---------------------------------------|--------|-------|-------|-------|
|                                            | 0.5                                   | 1      | 2     | 5     | 10    |
| $C_{\text{Dch}}$ ( $\text{F g}^{-1}$ )     | -                                     | 93.3   | 86.09 | 70.71 | 31.58 |
| $C_{\text{Ch}}$ ( $\text{F g}^{-1}$ )      | -                                     | 120.9  | 96.78 | 74.43 | 32.38 |
| $C_{\text{Average}}$ ( $\text{F g}^{-1}$ ) | -                                     | 106.65 | 80.26 | 72.57 | 31.98 |
| $\eta$ (%)                                 | -                                     | 77.17  | 88.95 | 95    | 97.52 |
